# Supplementary material
Source: publisher figshare collection journal article supplement (https://acs.figshare.com/ndownloader/files/5124145)
Supplement: Supplementary file 1 [file 5124145]

## Supporting Information

### Anthryl-Substituted Heterocycles as Acid-Sensitive Fluorescence Probes

Heiko Ihmels,<sup>a,\*</sup> Andreas Meiswinkel,<sup>b</sup> Christian J. Mohrschladt,<sup>b</sup> Daniela Otto,<sup>a</sup> Michael Waidelich,<sup>a</sup>

Michael Towler,<sup>c</sup> Rick White,<sup>c</sup> Martin Albrecht,<sup>d</sup> Alexander Schnurpfeil<sup>d</sup>

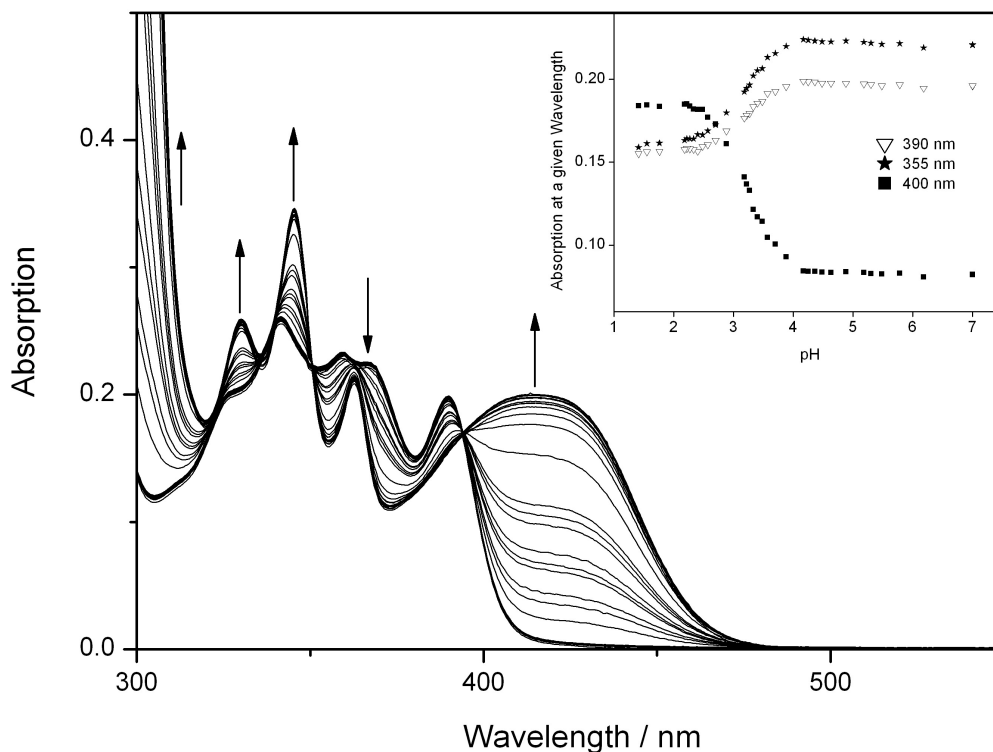

**Figure 2.** Spectrophotometric titration of **2a** ( $10^{-4}$  M in MeOH) with aqueous HCl; arrows indicate the development of band maxima during titration; inset: change of absorption intensity at 355, 390, and 400 nm at varying acid concentrations.

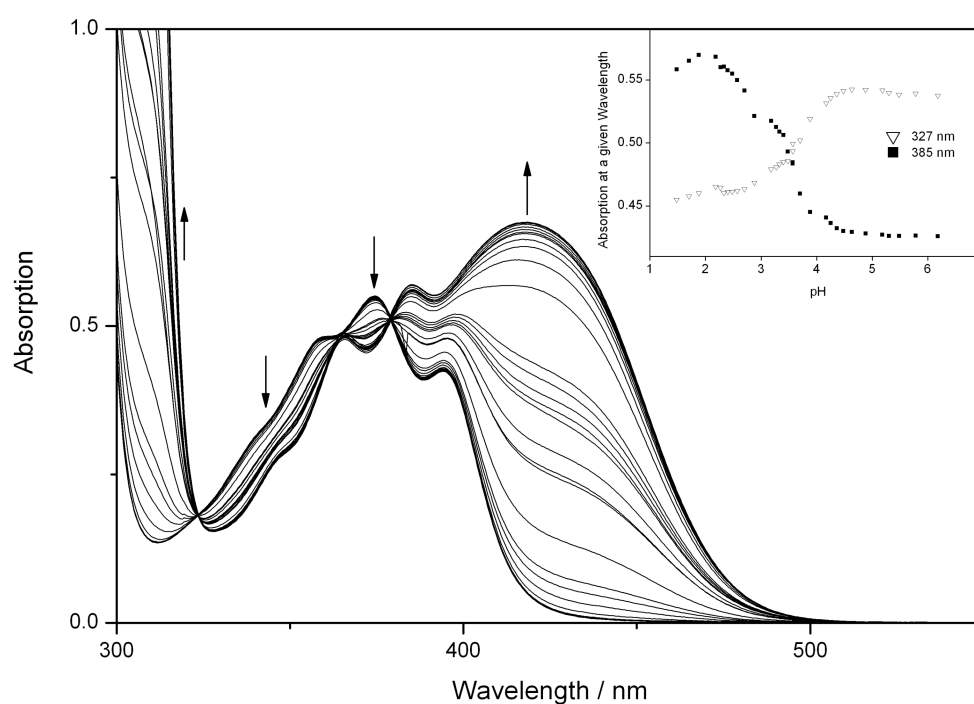

**Figure 3.** Spectrophotometric titration of **2b** ( $10^{-4}$  M in MeOH) with aqueous HCl; arrows indicate the development of band maxima during titration; inset: change of absorption intensity at 372 and 385 nm at varying acid concentrations.

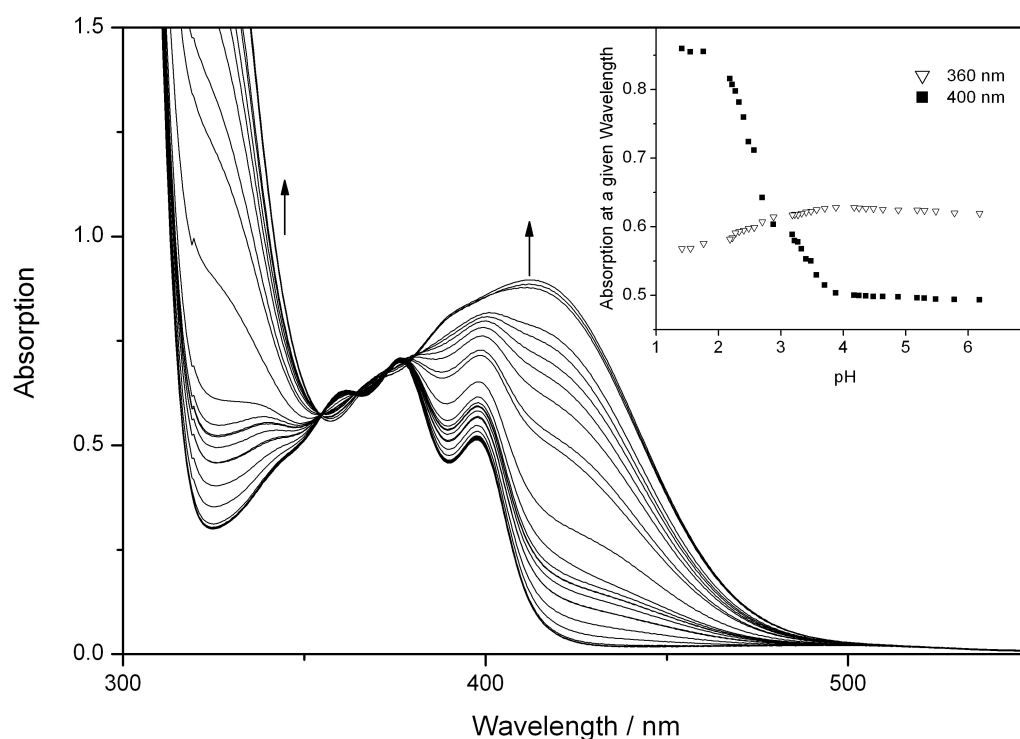

**Figure 4.** Spectrophotometric titration of **7** ( $10^{-4}$  M in MeOH) with aqueous HCl; arrows indicate the development of band maxima during titration; inset: change of absorption intensity at 360 and 400 nm at varying acid concentrations.

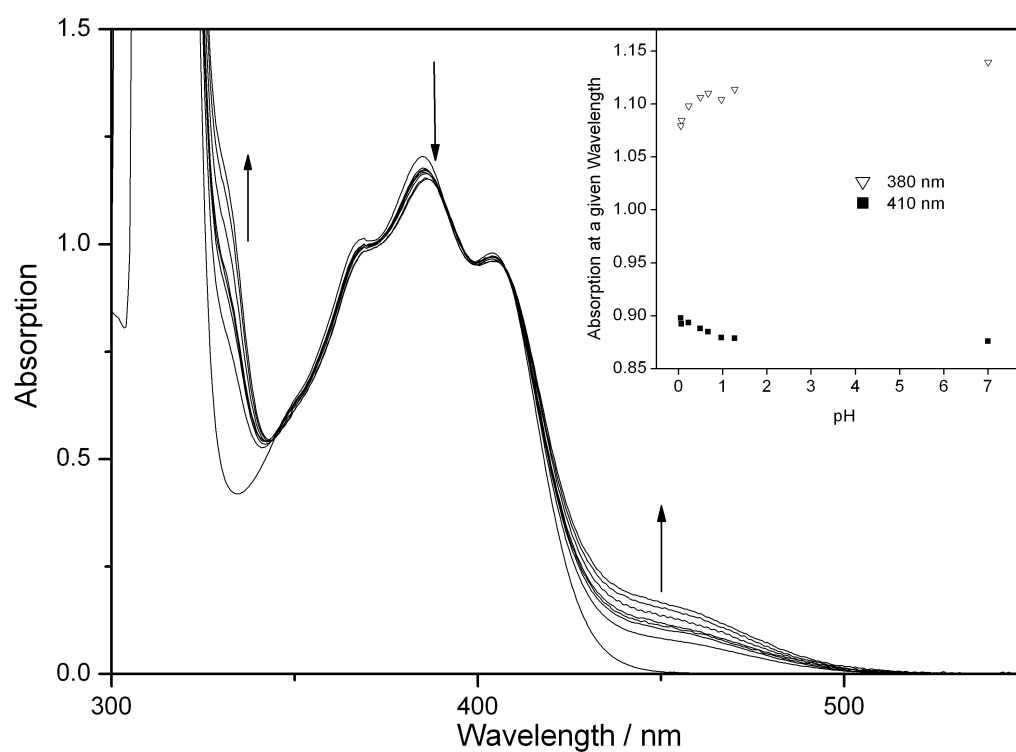

**Figure 5.** Spectrophotometric titration of **2c** ( $10^{-4}$  M in MeOH) with aqueous HCl; arrows indicate the development of band maxima during titration; inset: change of absorption intensity at 380 and 410 nm at varying acid concentrations.

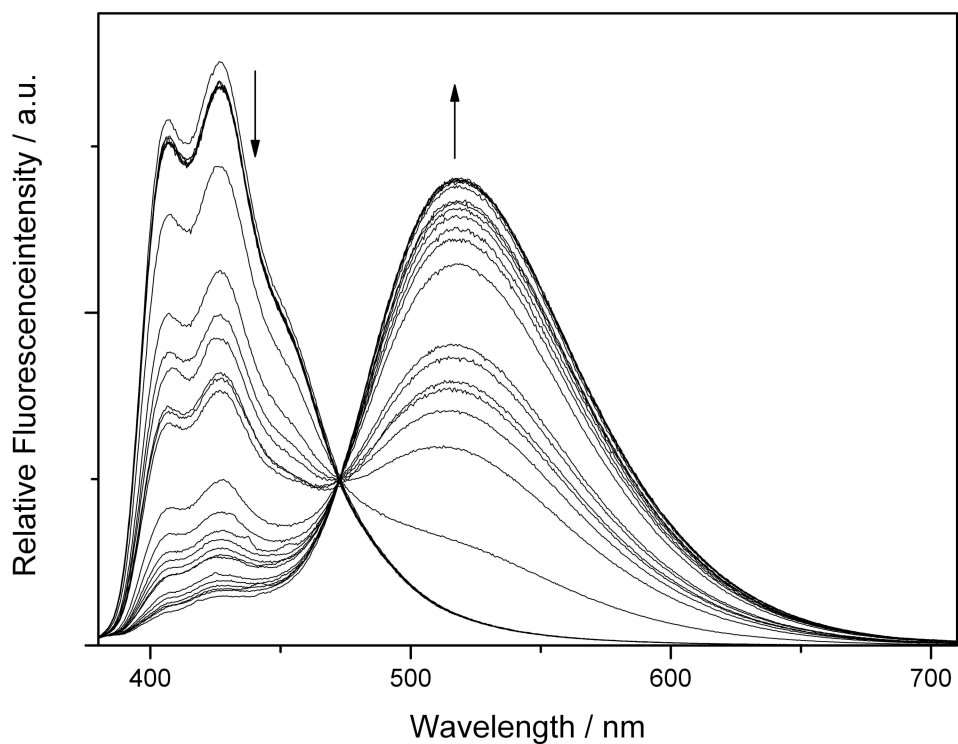

**Figure 6.** Spectrofluorimetric titration of **2a** ( $10^{-5}$  M in MeOH) with aqueous HCl; arrows indicate the development of band maxima during titration;  $\lambda_{\text{ex}} = 363$  nm; before titration:  $c(\text{HCl}) = 0$  M, titration end:  $c(\text{HCl}) = 3.2 \times 10^{-2}$  M.

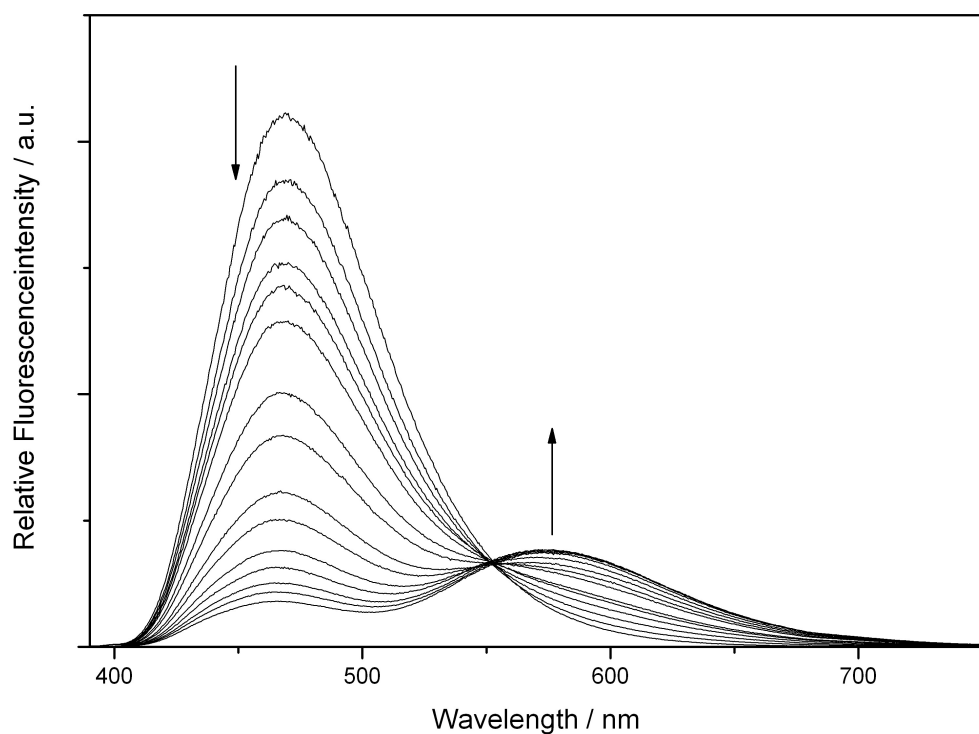

**Figure 9.** Spectrofluorimetric titration of **2c** ( $10^{-5}$  M in MeOH) with aqueous HCl; arrows indicate the development of band maxima during titration;  $\lambda_{\text{ex}} = 380$  nm before titration:  $c(\text{HCl}) = 0$  M, titration end:  $c(\text{HCl}) = 3.2 \times 10^{-1}$  M.

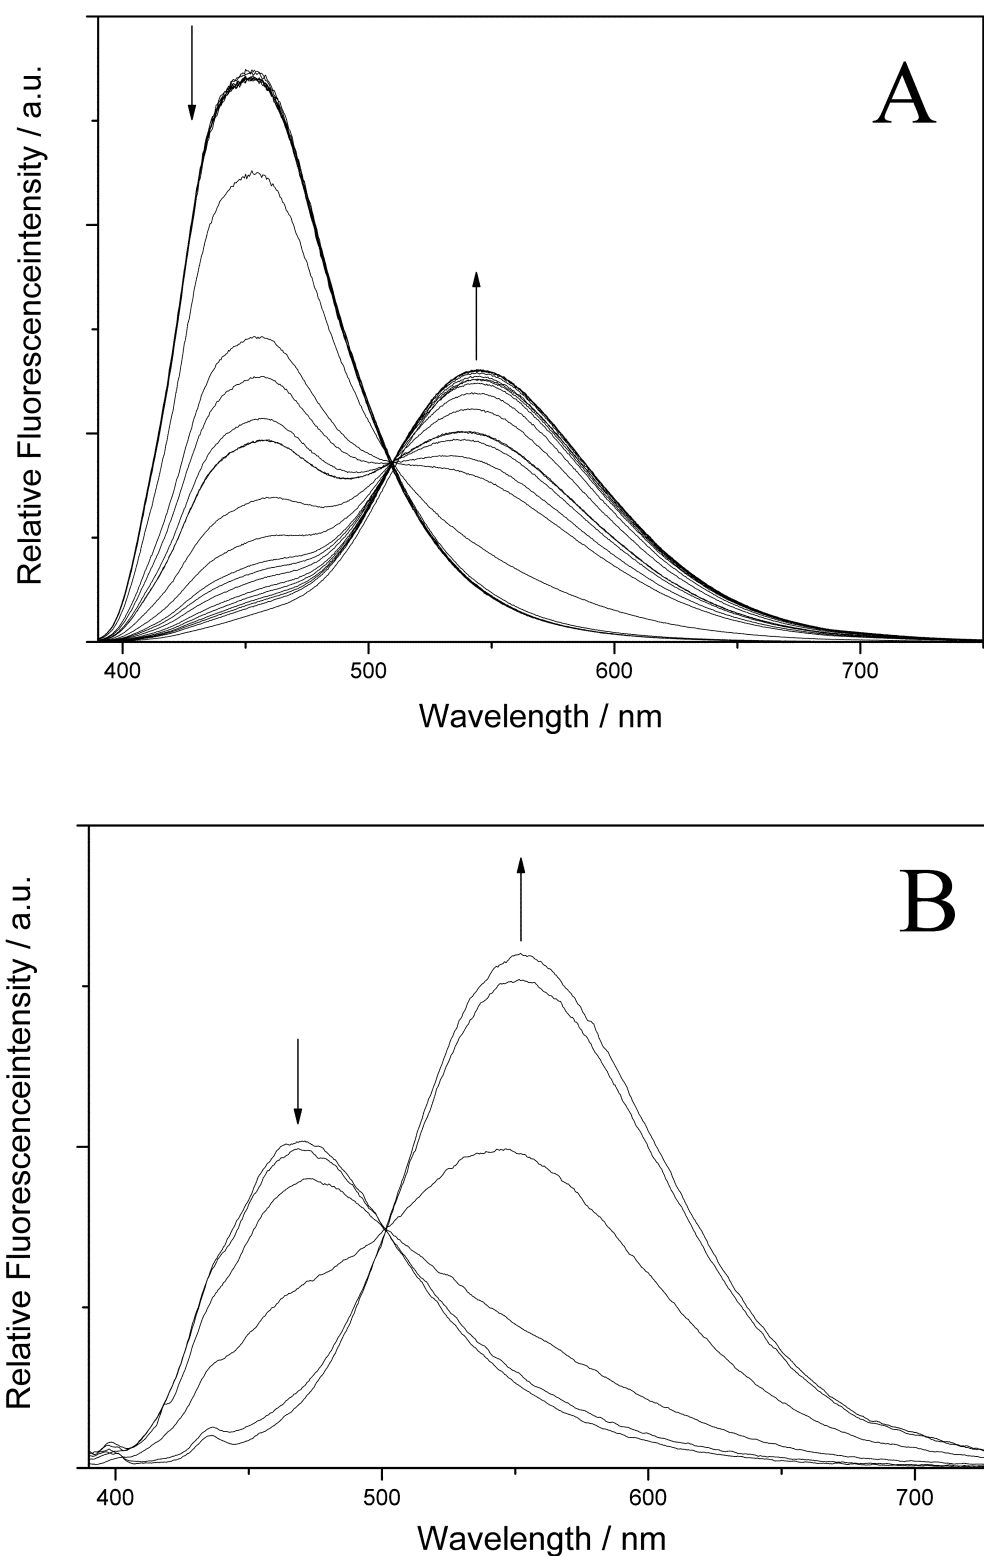

**Figure 7.** A: Spectrofluorimetric titration of **2b** ( $10^{-5}$  M in MeOH) with aqueous HCl; arrows indicate the development of band maxima during titration; before titration:  $c(\text{HCl}) = 0$  M, titration end:  $c(\text{HCl}) = 3.2 \times 10^{-2}$  M. B: Fluorescence spectra of **2b** ( $10^{-6}$  M in Britton-Robinson buffer at pH 2, 3, 4, 5, 6, 7; cont. 1% DMSO);  $\lambda_{\text{ex}} = 380$  nm, arrows indicate the development of band maxima upon decreasing pH

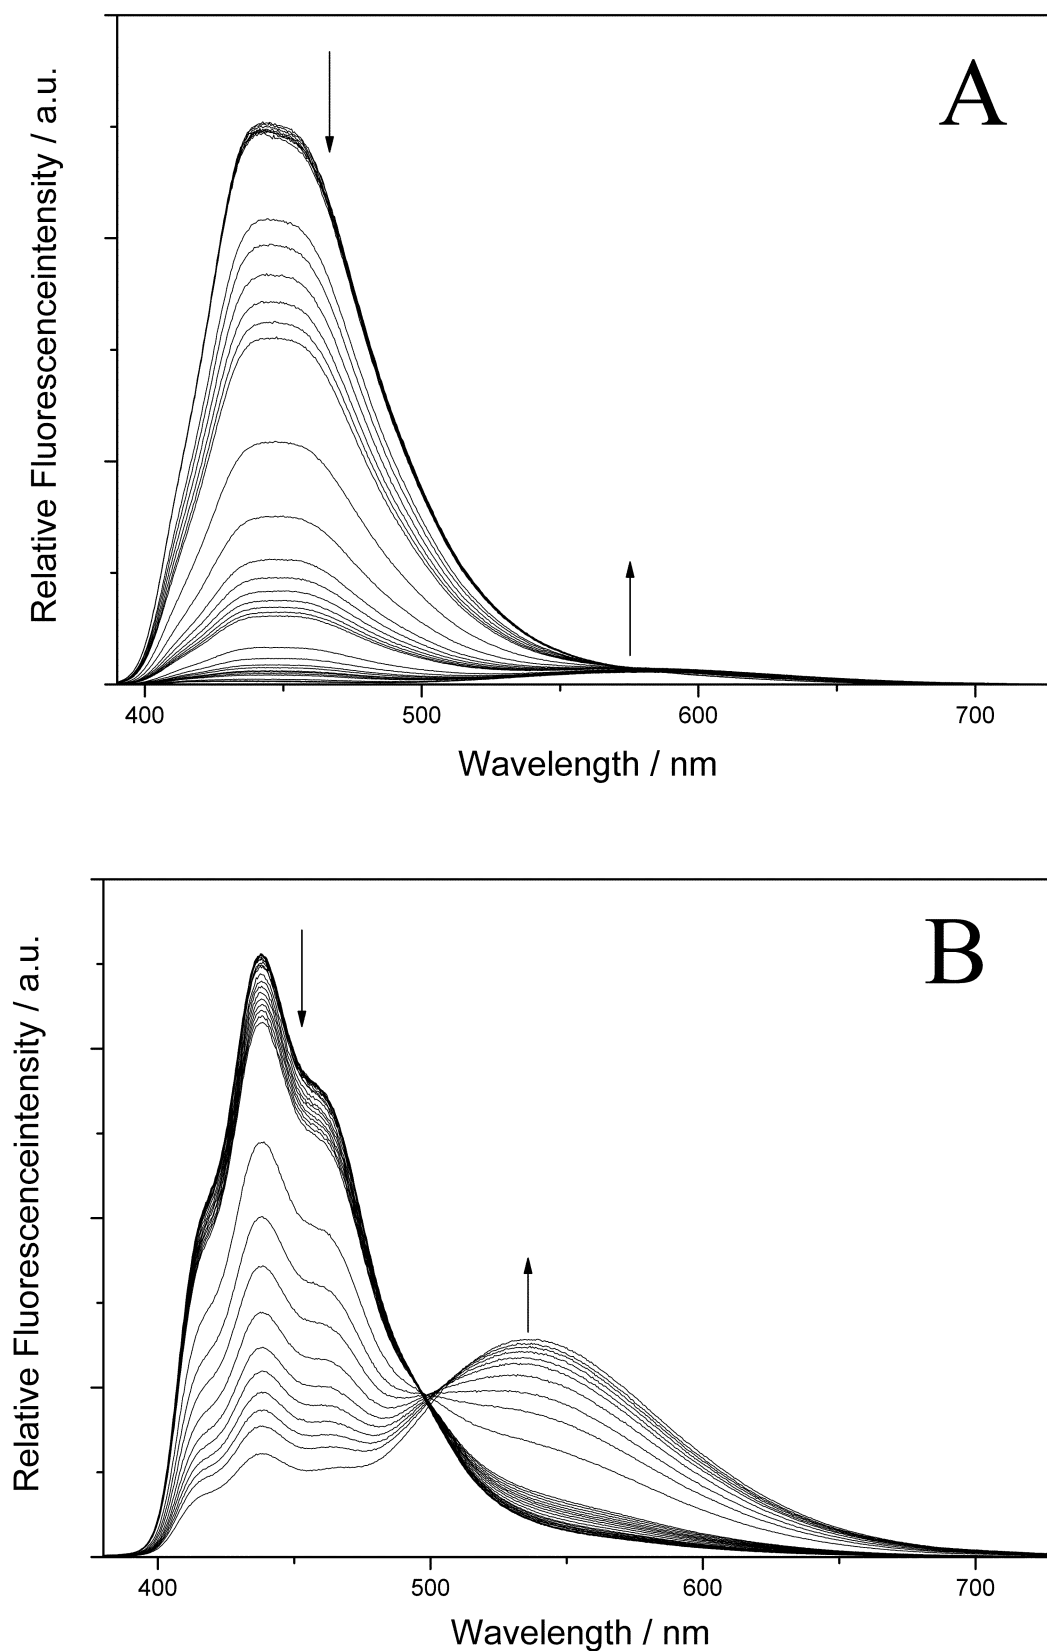

**Figure 10.** A: Spectrofluorimetric titration of **7** (10<sup>-5</sup> M in MeOH) with aqueous HCl; arrows indicate the development of band maxima during titration;  $\lambda_{\text{ex}} = 370$  nm; before titration:  $c(\text{HCl}) = 0$  M, titration end:  $c(\text{HCl}) = 5.0 \times 10^{-2}$  M. B: Spectrofluorimetric titration of **7** (10<sup>-5</sup> M in CHCl<sub>3</sub>) with trifluoroacetic acid; arrows indicate the development of band maxima during titration;  $\lambda_{\text{ex}} = 370$  nm; before titration:  $c(\text{HCl}) = 0$  M, titration end:  $c(\text{HCl}) = 1.6 \times 10^{-2}$  M.
